# Supplementary material for: Neurotrophins are expressed in giant cell arteritis lesions and may contribute to vascular remodeling
Source: PubMed Central journal article supplement (PMC4274683; doi:10.1186/s13075-014-0487-z), 2014-11-24

**Additional file 1. VSMC phenotype in immunocytochemistry assay**

**GCA**

**Control**

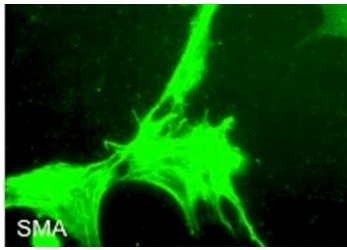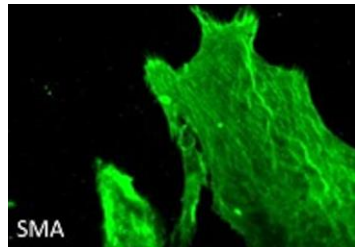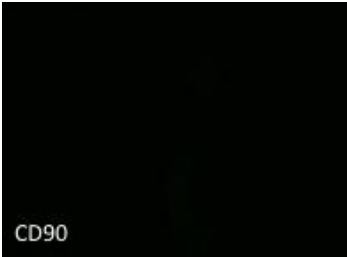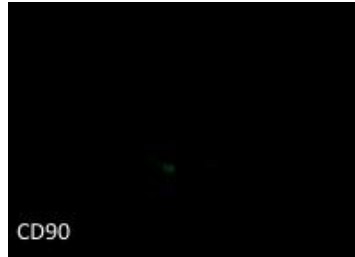

Supplement: 13075_2014_487_MOESM1_ESM.pdf [file 13075_2014_487_MOESM1_ESM.pdf]
