# Supplementary material for: Neurotrophins are expressed in giant cell arteritis lesions and may contribute to vascular remodeling
Source: PubMed Central journal article supplement (PMC4274683; doi:10.1186/s13075-014-0487-z), 2014-11-24
Supplement: 13075_2014_487_MOESM2_ESM.pdf [file 13075_2014_487_MOESM2_ESM.pdf]

## Additional file 2. Primers used in qPCR and RT-PCR studies

| Genes              | Accession number | qPCR Primers (3'6FAM-MGBNFQ5') | RT-PCR primers                                                                       | Length (bp) | TM (°C)   |
|--------------------|------------------|--------------------------------|--------------------------------------------------------------------------------------|-------------|-----------|
| NGF                | NM_002506.2      | Hs01113193_m1                  | <b>F:</b> ATACAGGCGGAACCACACTC<br><b>R:</b> TGCTCCTGTGAGTCCTGTTG                     | <b>313</b>  | <b>58</b> |
| BDNF               | NM_001143810     | Hs.00380947_m1                 | <b>F:</b> TACTTTGGTTGCATGAAGGCTCC<br><b>R:</b> ACTTGACTACTGAGCATCACCTG               | <b>266</b>  | <b>58</b> |
| NT-3               | NM_001102654     | Hs00267375_s1                  | <b>F:</b> TGGCATCCAAGGTAACAACA<br><b>R:</b> GGTGTCCATTGCAATCACTG                     | <b>229</b>  | <b>58</b> |
| TrkA               | NM_002507        | Hs01021011_m1                  | <b>F:</b> TCAACAAATGTGGACGGAGA<br><b>R:</b> GTGGTGAACACAGGCATCAC                     | <b>197</b>  | <b>58</b> |
| TrkB               | NM_001018064.1   | Hs.01093096_m1                 | <b>TrkB145</b><br><b>F:</b> AGGGCAACCCGCCACGGAA<br><b>R:</b> GGATCGGTCTGGGGAAAAG     | <b>571</b>  | <b>62</b> |
|                    |                  |                                | <b>TrkB 95</b><br><b>F:</b> GTTTCATAAGATCCCACTGGA<br><b>R:</b> TGCTGCTTAGCTGCCTGAGAG | <b>261</b>  | <b>58</b> |
| TrkC               | NM_001243101     | Hs00176797_m1                  | <b>F:</b> ACTTCCGTCAGGGACACAAC<br><b>R:</b> CCTCCCTCTGGAAATCCTTC                     | <b>219</b>  | <b>58</b> |
| p75 <sup>NTR</sup> | NM_002507        | Hs.00609976_m1                 | <b>F:</b> GTGGGACAGAGTCTGGGTGT<br><b>R:</b> AAGGAGGGGAGGTGATAGGA                     | <b>200</b>  | <b>58</b> |
| Sortilin           | NM_002959        | Hs.00907094_m1                 | <b>F:</b> GCTGGTCACAGTCGTAGCAG<br><b>R:</b> TTAGTGTGGGAGGCTGTGTC                     | <b>150</b>  | <b>60</b> |
| GAPDH              |                  |                                | <b>F:</b> GGGTGGAATCATATTGGAACATG<br><b>R:</b> GTCGGAGTCAACGGATTGG                   | <b>150</b>  | <b>58</b> |
| HPRT               | NM_000194        | Hs.02800695_m1                 |                                                                                      |             |           |

*F: Forward, R: Reverse*
