# Supplementary material for: Neurotrophins are expressed in giant cell arteritis lesions and may contribute to vascular remodeling
Source: PubMed Central journal article supplement (PMC4274683; doi:10.1186/s13075-014-0487-z), 2014-11-24

**Additional file 3. Dose-response of NT and NT receptor inhibitors**

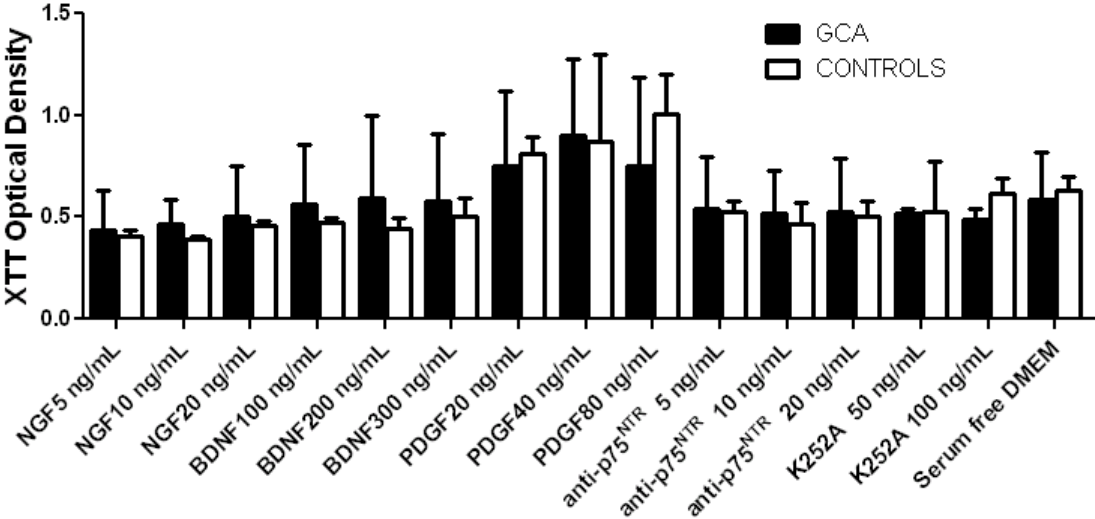

Supplement: 13075_2014_487_MOESM3_ESM.pdf [file 13075_2014_487_MOESM3_ESM.pdf]
